# Supplementary material
Source: PubMed Central journal article supplement (PMC5332515)
Supplement: NIHMS813951-supplement-40279_2016_618_MOESM1_ESM.pdf [file NIHMS813951-supplement-40279_2016_618_MOESM1_ESM.pdf]

# Association between Contact Sports and Colonization with Methicillin-Resistant *Staphylococcus aureus* in a Prospective Cohort of Collegiate Athletes

*Sports Medicine*

Jiménez-Truque, N<sup>1</sup>; Saye, EJ; Soper, N; Saville, BR; Thomsen, IP; Edwards, KM; Creech, CB

<sup>1</sup>Division of Pediatric Infectious Diseases, Vanderbilt University Medical Center, Nashville, Tennessee, USA; [natalia.jimenez@vanderbilt.edu](mailto:natalia.jimenez@vanderbilt.edu)

## Online Table 1. Sensitivity analyses for unadjusted models comparing the odds of colonization with MRSA or MSSA vs. no colonization over time

|                    | Model 1 <sup>a</sup><br>n=3,291 |            | Model 3 <sup>b</sup><br>n=2,873 |            | Model 4 <sup>c</sup><br>n=3,291 |            |
|--------------------|---------------------------------|------------|---------------------------------|------------|---------------------------------|------------|
|                    | OR                              | 95% CI     | OR                              | 95% CI     | OR                              | 95% CI     |
| Non-contact sports | 1.00                            | ---        | 1.00                            | ---        | 1.00                            | ---        |
| Contact sports     |                                 |            |                                 |            |                                 |            |
| MRSA               | 2.25                            | 1.14, 4.43 | 3.30                            | 1.50, 7.26 | 4.38                            | 2.08, 9.22 |
| MSSA               | 1.68                            | 1.06, 2.65 | 1.47                            | 0.85, 2.54 | 1.80                            | 1.11, 2.93 |

Abbreviations: OR, odds ratio; CI, confidence interval; MRSA, methicillin-resistant *Staphylococcus aureus*; MSSA, methicillin-susceptible *Staphylococcus aureus*.

<sup>a</sup>: Original model

<sup>b</sup>: Excluding subjects swabbed 5 times or less

<sup>c</sup>: categorizing baseball as a contact sport

**Association between Contact Sports and Colonization with Methicillin-Resistant *Staphylococcus aureus* in a Prospective Cohort of Collegiate Athletes**

*Sports Medicine*

Jiménez-Truque, N<sup>1</sup>; Saye, EJ; Soper, N; Saville, BR; Thomsen, IP; Edwards, KM; Creech, CB

<sup>1</sup>Division of Pediatric Infectious Diseases, Vanderbilt University Medical Center, Nashville, Tennessee, USA; [natalia.jimenez@vanderbilt.edu](mailto:natalia.jimenez@vanderbilt.edu)

**Online Table 2. Sensitivity analyses for adjusted models, comparing the odds of colonization with MRSA or MSSA vs. no colonization over time**

|                              | Model 1 <sup>a</sup><br>n=3,291 |             | Model 2 <sup>b</sup><br>n=3,291 |             | Model 3 <sup>c</sup><br>n=2,873 |             | Model 4 <sup>d</sup><br>n=3,291 |             |
|------------------------------|---------------------------------|-------------|---------------------------------|-------------|---------------------------------|-------------|---------------------------------|-------------|
|                              | OR                              | 95% CI      |
| Non-contact sports           | 1.00                            | ---         | 1.00                            | ---         | 1.00                            | ---         | 1.00                            | ---         |
| Contact sports               |                                 |             |                                 |             |                                 |             |                                 |             |
| MRSA                         | 2.36                            | 1.13, 4.93  | 3.08                            | 1.36, 6.99  | 3.59                            | 1.50, 8.62  | 3.79                            | 1.68, 8.52  |
| MSSA                         | 1.57                            | 0.94, 2.62  | 1.57                            | 0.89, 2.77  | 1.33                            | 0.71, 2.50  | 1.67                            | 0.95, 2.92  |
| Male                         | 1.00                            | ---         | 1.00                            | ---         | 1.00                            | ---         | 1.00                            | ---         |
| Female                       |                                 |             |                                 |             |                                 |             |                                 |             |
| MRSA                         | 0.26                            | 0.13, 0.50  | 0.25                            | 0.13, 0.48  | 0.42                            | 0.19, 0.90  | 0.36                            | 0.17, 0.75  |
| MSSA                         | 0.80                            | 0.50, 1.28  | 0.79                            | 0.49, 1.26  | 1.15                            | 0.66, 2.00  | 0.91                            | 0.55, 1.53  |
| Caucasian                    | 1.00                            | ---         | 1.00                            | ---         | 1.00                            | ---         | 1.00                            | ---         |
| African-American             |                                 |             |                                 |             |                                 |             |                                 |             |
| MRSA                         | 0.35                            | 0.15, 0.79  | 0.34                            | 0.15, 0.78  | 0.38                            | 0.17, 0.86  | 0.33                            | 0.15, 0.72  |
| MSSA                         | 0.77                            | 0.44, 1.34  | 0.76                            | 0.43, 1.35  | 0.78                            | 0.43, 1.43  | 0.79                            | 0.46, 1.38  |
| Other race/ethnicity         |                                 |             |                                 |             |                                 |             |                                 |             |
| MRSA                         | 0.46                            | 0.09, 2.31  | 0.40                            | 0.08, 2.02  | 0.18                            | 0.02, 1.53  | 0.41                            | 0.08, 2.04  |
| MSSA                         | 1.39                            | 0.47, 4.15  | 1.47                            | 0.49, 4.40  | 2.73                            | 0.76, 9.85  | 1.40                            | 0.47, 4.13  |
| Freshman                     | 1.00                            | ---         | 1.00                            | ---         | 1.00                            | ---         | 1.00                            | ---         |
| Sophomore                    |                                 |             |                                 |             |                                 |             |                                 |             |
| MRSA                         | 1.25                            | 0.53, 2.79  | 1.40                            | 0.63, 3.13  | 1.22                            | 0.54, 2.75  | 1.24                            | 0.56, 2.75  |
| MSSA                         | 1.79                            | 1.02, 3.14  | 1.82                            | 1.03, 3.22  | 1.61                            | 0.88, 2.95  | 1.74                            | 0.99, 3.04  |
| Junior                       |                                 |             |                                 |             |                                 |             |                                 |             |
| MRSA                         | 1.25                            | 0.54, 2.90  | 1.26                            | 0.55, 2.90  | 1.33                            | 0.58, 3.07  | 1.27                            | 0.55, 2.92  |
| MSSA                         | 1.69                            | 0.94, 3.04  | 1.67                            | 0.92, 3.01  | 2.04                            | 1.09, 3.82  | 1.71                            | 0.95, 3.07  |
| Senior                       |                                 |             |                                 |             |                                 |             |                                 |             |
| MRSA                         | 1.07                            | 0.40, 2.81  | 0.84                            | 0.31, 2.29  | 0.89                            | 0.29, 2.79  | 1.10                            | 0.42, 2.86  |
| MSSA                         | 1.20                            | 0.61, 2.37  | 1.21                            | 0.60, 2.46  | 1.38                            | 0.60, 3.19  | 1.23                            | 0.63, 2.40  |
| Trainers                     |                                 |             |                                 |             |                                 |             |                                 |             |
| MRSA                         | 0.97                            | 0.14, 6.69  | 1.06                            | 0.15, 7.37  | 1.67                            | 0.25, 11.15 | 1.54                            | 0.22, 10.86 |
| MSSA                         | 0.82                            | 0.21, 3.27  | 0.74                            | 0.18, 3.01  | 0.73                            | 0.17, 3.13  | 0.90                            | 0.22, 3.65  |
| No previous SA infections    | 1.00                            | ---         | 1.00                            | ---         | 1.00                            | ---         | 1.00                            | ---         |
| Previous SA infections       |                                 |             |                                 |             |                                 |             |                                 |             |
| MRSA                         | 5.35                            | 1.51, 18.87 | 5.41                            | 1.55, 18.87 | 7.75                            | 2.30, 26.32 | 5.38                            | 1.54, 18.77 |
| MSSA                         | 2.19                            | 0.86, 5.52  | 2.09                            | 0.83, 5.29  | 2.89                            | 1.10, 7.63  | 2.14                            | 0.85, 5.40  |
| No SA infections in contacts | 1.00                            | ---         | 1.00                            | ---         | 1.00                            | ---         | 1.00                            | ---         |
| SA infections in contacts    |                                 |             |                                 |             |                                 |             |                                 |             |
| MRSA                         | 0.45                            | 0.22, 0.94  | 0.47                            | 0.23, 0.98  | 0.55                            | 0.26, 1.13  | 0.44                            | 0.21, 0.90  |
| MSSA                         | 0.72                            | 0.43, 1.20  | 0.71                            | 0.43, 1.19  | 0.75                            | 0.43, 1.31  | 0.73                            | 0.44, 1.20  |

**Online Table 2. Sensitivity analyses for adjusted models, comparing the odds of colonization with MRSA or MSSA vs. no colonization over time (continued)**

|                         | Model 1 <sup>a</sup><br>n=3,291 |             | Model 2 <sup>b</sup><br>n=3,291 |             | Model 3 <sup>c</sup><br>n=2,873 |             | Model 4 <sup>d</sup><br>n=3,291 |             |
|-------------------------|---------------------------------|-------------|---------------------------------|-------------|---------------------------------|-------------|---------------------------------|-------------|
|                         | OR                              | 95% CI      |
| No comorbidities        | 1.00                            | ---         | 1.00                            | ---         | 1.00                            | ---         | 1.00                            | ---         |
| Any comorbidities       |                                 |             |                                 |             |                                 |             |                                 |             |
| MRSA                    | 2.90                            | 0.65, 13.01 | 2.91                            | 0.66, 12.81 | 3.35                            | 0.83, 13.58 | 3.21                            | 0.73, 14.18 |
| MSSA                    | 1.71                            | 0.59, 5.01  | 1.67                            | 0.57, 4.87  | 1.87                            | 0.62, 5.61  | 1.67                            | 0.58, 4.88  |
| No previous surgeries   | 1.00                            | ---         | 1.00                            | ---         | 1.00                            | ---         | 1.00                            | ---         |
| Previous surgeries      |                                 |             |                                 |             |                                 |             |                                 |             |
| MRSA                    | 1.28                            | 0.63, 2.60  | 1.31                            | 0.65, 2.63  | 1.33                            | 0.66, 2.68  | 1.30                            | 0.65, 2.61  |
| MSSA                    | 1.31                            | 0.80, 2.15  | 1.29                            | 0.79, 2.12  | 1.27                            | 0.75, 2.15  | 1.35                            | 0.83, 2.21  |
| No previous antibiotics | 1.00                            | ---         | 1.00                            | ---         | 1.00                            | ---         | 1.00                            | ---         |
| Previous antibiotics    |                                 |             |                                 |             |                                 |             |                                 |             |
| MRSA                    | 1.29                            | 0.50, 3.34  | 1.30                            | 0.51, 3.33  | 1.63                            | 0.64, 4.20  | 1.40                            | 0.54, 3.59  |
| MSSA                    | 0.59                            | 0.30, 1.18  | 0.60                            | 0.30, 1.19  | 0.66                            | 0.31, 1.38  | 0.61                            | 0.30, 1.20  |

Abbreviations: OR, odds ratio; CI, confidence interval; MRSA, methicillin-resistant *Staphylococcus aureus*; MSSA, methicillin-susceptible *Staphylococcus aureus*.

<sup>a</sup>: Original model [Adjusted for gender, race (African-American, Caucasian, other), year (Freshman, Junior, Sophomore, Senior, trainer), history of staphylococcal infections, staphylococcal infections in contacts, any comorbidities, previous surgeries, previous antibiotics, contact sport – gender interaction, and time]

<sup>b</sup>: Adjusting for the number of months athletes were swabbed

<sup>c</sup>: Excluding subjects swabbed 5 times or less

<sup>d</sup>: Categorizing baseball as a contact sport
